# Supplementary material for: Does lauromacrogol 3% alone is effective in management of pelvic congestion syndrome through transcatheter ovarian vein embolization?
Source: Research Square preprint supplement (doi:10.21203/rs.3.rs-5284998/v1), 2024-12-02
Supplement: Supplementary file 1 [file 0002deeb3bd61053fb660ea7.docx]

Table ligand

Table 1: Age& clinical data of the participants

Table 2: Pre and post-procedure VAS assessment

Table 3: Technical success

Table 4: Clinical success by TVUS

Table 5: Association among clinical data and post-procedure VAS.

Table 6: Correlation among TVUS after 2 weeks and clinical data of the participants.

Table 7: Relation between TVUS after 2 weeks and clinical data of the participants.

Table 1: Age& clinical data of the participants

|  | **Distribution (N=50)** | |
| --- | --- | --- |
| **Age (years):**  Mean± SD  Range | 30.7±4.3  24-40 | |
| **Duration of PCS (years)**  Mean± Standard deviations  Range | 3.7±1.3  1-6 | |
|  | **N** | **%** |
| **Age group:**  < 30 years  > 30 years | 30  20 | 60.0  40.0 |
| **Duration of PCS:**  < 2 years  > 2 years | 6  44 | 12.0  88.0 |
| **Number of deliveries:**  < 2  > 2 | 12  38 | 24.0  76.0 |

SD: standard deviation, range: minimum- maximum.

Table 2: Pre and post-procedure VAS assessment

|  | **Pre-procedure (N= 50)** | | **Post-procedure**  **(N= 50)** | | **Wilcoxon test** | **P-value** |
| --- | --- | --- | --- | --- | --- | --- |
| **VAS:**  Mean± SD  Range | 8.8±1.2  7-10 | | 1.8±1.4  1-8 | | 6.18 | **<0.001**  **(HS)** |
|  | **N** | **%** | **N** | **%** | **Marginal homogenity test** | **P-value** |
| **VAS assessment:**  No pain  Mild pain  Moderate  Severe | -  -  10  40 | -  -  20.0  80.0 | 24  24  -  2 | 48.0  48.0  -  4 | **<0.001**  **(HS)** |

HS: Highly significant (P<0.001).

Table 3: Technical success

|  | **Distribution (N=50)** | |
| --- | --- | --- |
|  | **N** | **%** |
| **Technical success:**  Yes | 50 | 100.0 |
| **Embolized ovarian vein:**  Left  right and left  right internal iliac vein refluxing tributaries | 24  24  2 | 48.0  48.0  4.0 |

Table 4: Clinical success by TVUS

|  | **Distribution (N=50)** | |
| --- | --- | --- |
|  | **N** | **%** |
| **TVUS after 2 weeks:**  complete resolution  static varices | 28  22 | 56.0  44.0 |
| **TVUS after 6 months:**  Recurrence  No recurrence | 2  48 | 4.0  96.0 |

Table 5: Association among clinical data and post-procedure VAS.

|  | **post-procedure VAS** | |
| --- | --- | --- |
|  | **rrho** | **P-value** |
| **Age (years)** | 0.454 | **0.001 (S)** |
| **Duration of PCS (years)** | - 0.034 | 0.815 |
| **Number of previous deliveries** | - 0.458 | **<0.001 (HS)** |

rrho : Spearman correlation coefficient, S: significant (P<0.05), HS: Highly significant (P<0.001).

Table 6: Correlation among TVUS after 2 weeks and clinical data of the participants.

|  | **Complete resolution**  **(N=28)** | | **Static varices**  **(N=22)** | | **χ2** | **P-value** |
| --- | --- | --- | --- | --- | --- | --- |
| **N** | **%** | **N** | **%** |
| **Age group:**  < 30 years  > 30 years | 16  12 | 57.1  42.9 | 14  8 | 63.6  36.4 | 0.22 | 0.642 |
| **Duration of PCS:**  < 2 years  > 2 years | 2  26 | 7.1  92.9 | 4  18 | 18.2  81.8 | **FE**  1.42 | 0.385 |
| **Number of deliveries:**  < 2  > 2 | 6  22 | 21.4  78.6 | 6  16 | 27.3  72.7 | 0.23 | 0.631 |

Table 7: Relation between TVUS after 2 weeks and clinical data of the participants.

|  | **Recurrence**  **(N=2)** | | **No recurrence**  **(N=48)** | |
| --- | --- | --- | --- | --- |
| **N** | **%** | **N** | **%** |
| **Age group:**  < 30 years  > 30 years | -  2 | -  100.0 | 30  18 | 62.5  37.5 |
| **Duration of PCS:**  < 2 years  > 2 years | -  2 | -  100.0 | 6  42 | 12.5  87.5 |
| **Number of deliveries:**  < 2  > 2 | -  2 | -  100.0 | 12  36 | 25.0  75.0 |
